# Supplementary material for: Have the same pathogenicity of Ureaplasma Parvum and Ureaplasma Urealyticum in non-specific cervicitis? -based on digital droplet PCR assay
Source: Research Square preprint supplement (doi:10.21203/rs.3.rs-284649/v1), 2021-03-29
Supplement: Supplementary file 1 [file 07270274ed93a529dbadb622.pdf]

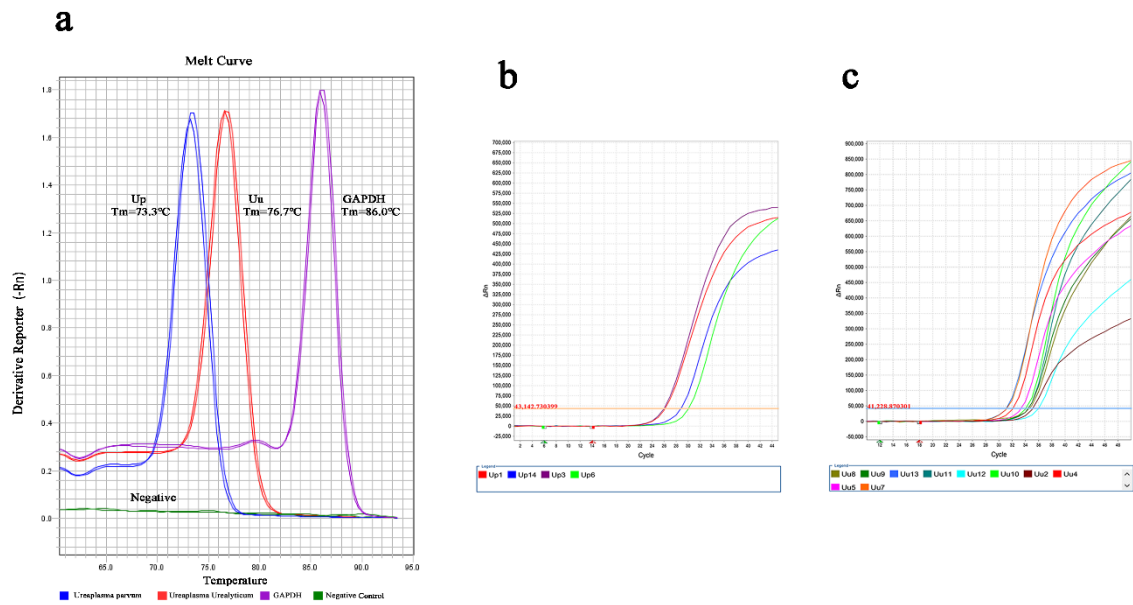

Supplement Figure 1: (a) Melt curve. The amplification result of Up standard strain 1(Up1, ATCC 27813), Uu 4 (ATCC 27814) standard strain, plasmid GAPDH were red, yellow, purple single peak shape, respectively. Sterile water as a template was negative control (Green). (b) Amplification curves of specific primers and probes targeted Up. The standard strain Up1 (ATCC27813), Up3 (ATCC27815), Up6 (ATCC27818), Up14 (ATCC33697) were read, purple, green, and blue amplification curves, respectively. (c) Amplification curves of specific primers and probes targeted Uu. The standard strain Uu2 (ATCC27814), Uu4 (ATCC27816), Uu5 (ATCC27817), Uu7 (ATCC27819), Uu8 (ATCC27618), Uu9 (ATCC33175), Uu10 (ATCC33699), Uu11 (ATCC33695), Uu12 (ATCC33696), Uu13 (ATCC33698) were brown, red, rose red, orange, yellow-green, dark green, bright green, cyan, lake blue, dark blue amplification curves, respectively..
