# Supplementary material for: Have the same pathogenicity of Ureaplasma Parvum and Ureaplasma Urealyticum in non-specific cervicitis? -based on digital droplet PCR assay
Source: Research Square preprint supplement (doi:10.21203/rs.3.rs-284649/v1), 2021-03-29

## Supplement Figure 2

The DNAs of standard strains *U.parvum* Str.3 (ATCC27815) were diluted by a 10-fold gradient, and each sample was repeated for 3 times by qPCR and ddPCR. As shown in the Supplement Figure 2a, the correlation coefficient  $R^2$  was 0.998, and the amplification efficiency was 103.30% in qPCR, while the correlation coefficient  $R^2$  was 0.998 in ddPCR.

### a. *U.parvum* (qPCR)

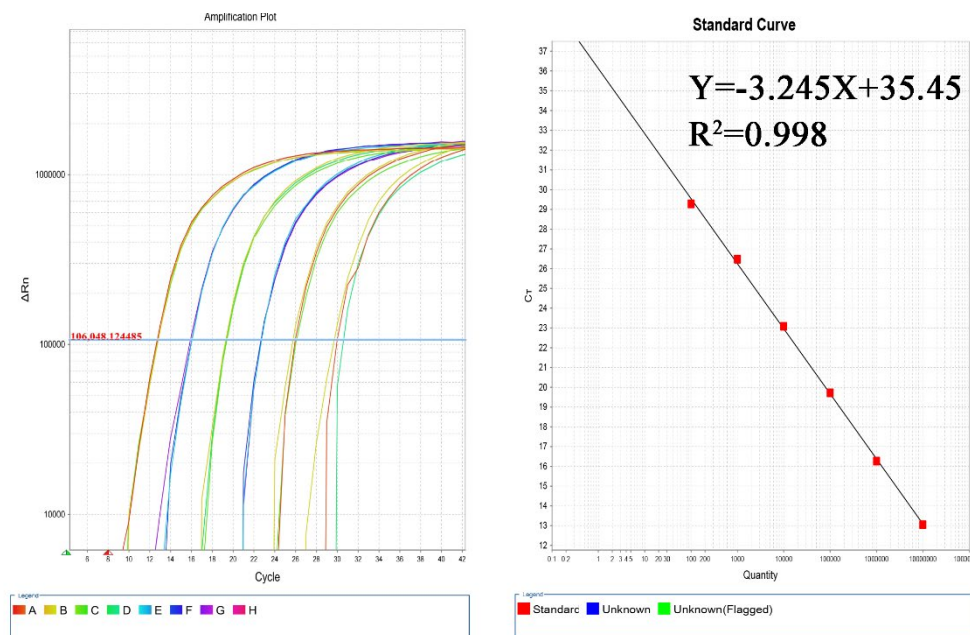

### b. *U.parvum* (ddPCR)

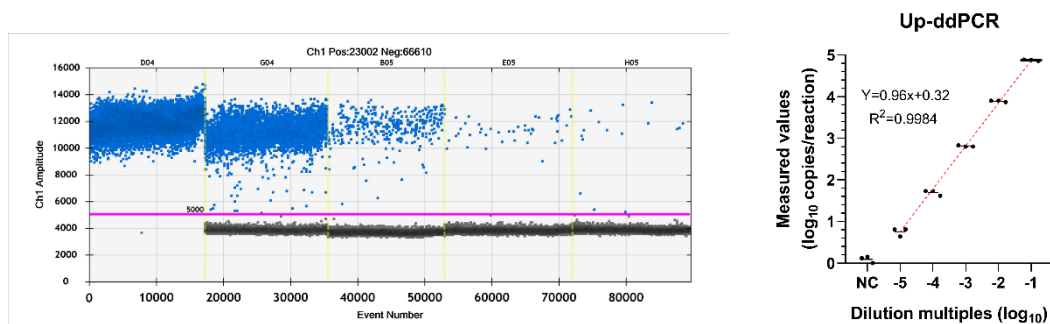

Supplement: Supplementary file 2 [file 1b5b515bc97152d50b63649e.pdf]
