# Supplementary material for: Have the same pathogenicity of Ureaplasma Parvum and Ureaplasma Urealyticum in non-specific cervicitis? -based on digital droplet PCR assay
Source: Research Square preprint supplement (doi:10.21203/rs.3.rs-284649/v1), 2021-03-29
Supplement: Supplementary file 2 [file 634b6bdb1394964606072537.docx]

Table 2 **Sequences of the primers and probes used in the qPCR and ddPCR assay.**

| target | Primer/probe | Sequence (5’-3’) | Amplicon Size |
| --- | --- | --- | --- |
| *U.parvum* | Primer Forward | TAGTTGCTCATAAAATCAC | 111 bp |
| Primer Reverse | CGTTCCATATATAAACAGCTATAAC |
| Probe | FAM-CTATGCGTGAAAAGATG-BHQ1 |
| *U.urealyticum* | Primer Forward | TAAGTGTTTTAGTATTAGTGAGC | 100 bp |
| Primer Reverse | TGCTGCTAAAACGCTTTGTGC |
| Probe | FAM-CACCATCACCACTTTATT-BHQ1 |
