# Supplementary material for: Have the same pathogenicity of Ureaplasma Parvum and Ureaplasma Urealyticum in non-specific cervicitis? -based on digital droplet PCR assay
Source: Research Square preprint supplement (doi:10.21203/rs.3.rs-284649/v1), 2021-03-29
Supplement: Supplementary file 3 [file 9c284c8ab69df38b660eff3a.pdf]

Supplement Figure no.3

The high concentration and low concentration of *U.parvum* and *U.urealyticum* were detected by ddPCR for 8 times in one batch, and the corresponding CV were calculated.

The CV value of *U.parvum* with high concentration and low concentration were 2.25% and 1.09%, respectively by ddPCR. The CV value of *U.urealyticum* with high concentration and low concentration were 4.58% and 1.15% respectively by dd PCR.

Table The in-batch precision of *Ureaplasma* spp. was detected by ddPCR.

| Sample | U.parvum-<br>high | U.parvum-<br>low | U.urealyticum-<br>high | U.urealyticum-<br>low |
|--------|-------------------|------------------|------------------------|-----------------------|
| Rep1   | 123               | 31.6             | 364                    | 30.8                  |
| Rep2   | 123               | 31.7             | 348                    | 31.5                  |
| Rep3   | 126               | 31.0             | 354                    | 31.6                  |
| Rep4   | 122               | 31.6             | 382                    | 31.7                  |
| Rep5   | 124               | 31.8             | 396                    | 31                    |
| Rep6   | 129               | 31.9             | 397                    | 31.6                  |
| Rep7   | 122               | 31.9             | 367                    | 31.8                  |
| Rep8   | 119               | 32.3             | 380                    | 31.9                  |
| Mean   | 123.50            | 31.73            | 373.50                 | 31.49                 |
| SD     | 2.78              | 0.35             | 17.09                  | 0.36                  |
| CV (%) | 2.25              | 1.09             | 4.58                   | 1.15                  |
