# Supplementary material for: Have the same pathogenicity of Ureaplasma Parvum and Ureaplasma Urealyticum in non-specific cervicitis? -based on digital droplet PCR assay
Source: Research Square preprint supplement (doi:10.21203/rs.3.rs-284649/v1), 2021-03-29
Supplement: Supplementary file 3 [file c9e5328eef84046c895fd8c4.docx]

Table 1. Schematic flow chart showing the inclusion specimens in this study.

Assessed for eligibility (n= 537)

Excluded fungal and *T. vaginalis* (n=8)

Exclude unqualified DNA (n=13)

Exclude *C. trachomatis* (n=12)

Exclude *N. gonorrhoeae* (n=0)

Enrolled and included in the analysis (n=504)

qPCR

qPCR

NSC controp (n=293)

U.parvum-positive (n=152, 51.9%)

U.urealyticum-positive (n=24, 8.2%)

Co-infection (n=11, 3.8%)

Control group (n=211)

U.parvum-positive (n=99, 46.9%)

U.urealyticum-positive (n=17, 8.1%)

Co-infection (n=5, 2.4%)
