# Supplementary material for: Have the same pathogenicity of Ureaplasma Parvum and Ureaplasma Urealyticum in non-specific cervicitis? -based on digital droplet PCR assay
Source: Research Square preprint supplement (doi:10.21203/rs.3.rs-284649/v1), 2021-03-29
Supplement: Supplementary file 6 [file 3a0e86189130122ee91a4dea.docx]

Table 3. the Prevalence and Ct value by qPCR about *U.parvum* and *U.urealyticum* in NSC and control group.

|  | n | Up+ (%) | Ct value (Mean±SD) | Uu+ (%) | Ct value (Mean±SD) | Up+Uu+ (%) |
| --- | --- | --- | --- | --- | --- | --- |
| NSC | 293 | 152 (51.9) | 31.33±4.07 | 24 (8.2) | 33.16±4.31 | 11 (3.8) |
| Control | 211 | 99 (46.9) | 33.68±4.10 | 17 (8.1) | 34.97±4.40 | 5 (2.4) |
| *P* | 504 | 0.272 | <0.0001 | 0.957 | 0.196 | 0.382 |
