# Supplementary material for: Have the same pathogenicity of Ureaplasma Parvum and Ureaplasma Urealyticum in non-specific cervicitis? -based on digital droplet PCR assay
Source: Research Square preprint supplement (doi:10.21203/rs.3.rs-284649/v1), 2021-03-29
Supplement: Supplementary file 7 [file f1bb2b4d3ff91b8823a13e69.docx]

Table 4. the Ct value in qPCR and copy number in ddPCR about *U.parvum* and *U.urealyticum* in NSC and control group.

| Group | | *U.parvum* | | | | | *U.urealyticum* | | | |
| --- | --- | --- | --- | --- | --- | --- | --- | --- | --- | --- |
| N | Ct value  (Mean±SD) | Copies Median (Interquartile range) | Log (10 Up/GAPDH) | N | | Ct value  (Mean±SD) | Copies Median (Interquartile range) | Log (10 Uu/GAPDH) |
| NSC | 48 | | 29.34±2.84 | 599 (210.5-1575) | 2.36±0.64 | 22 * | | 33.59±3.68 | 1.26 (0.15-6.5) | 0.10±1.50 |
| Control | 33 | | 33.32±3.22 | 17.4 (5.7-153.4) | 1.06±0.65 | 14 | | 34.74±4.72 | 5.35 (0.50-179.9) | 0.84±1.46 |
| *P* | 81 | | <0.0001 | <0.0001 | <0.0001 | 36 | | 0.4167 | 0.9495 | 0.1553 |

*: Exclde a outlier from Non-specific cervicitis patients (the mean Ct value of qPCR was 21.17, the load of quantified by ddPCR was 4190 copies)
