# Supplementary figures and images for: Have the same pathogenicity of Ureaplasma Parvum and Ureaplasma Urealyticum in non-specific cervicitis? -based on digital droplet PCR assay
Source: Research Square preprint supplement (doi:10.21203/rs.3.rs-284649/v1), 2021-03-29

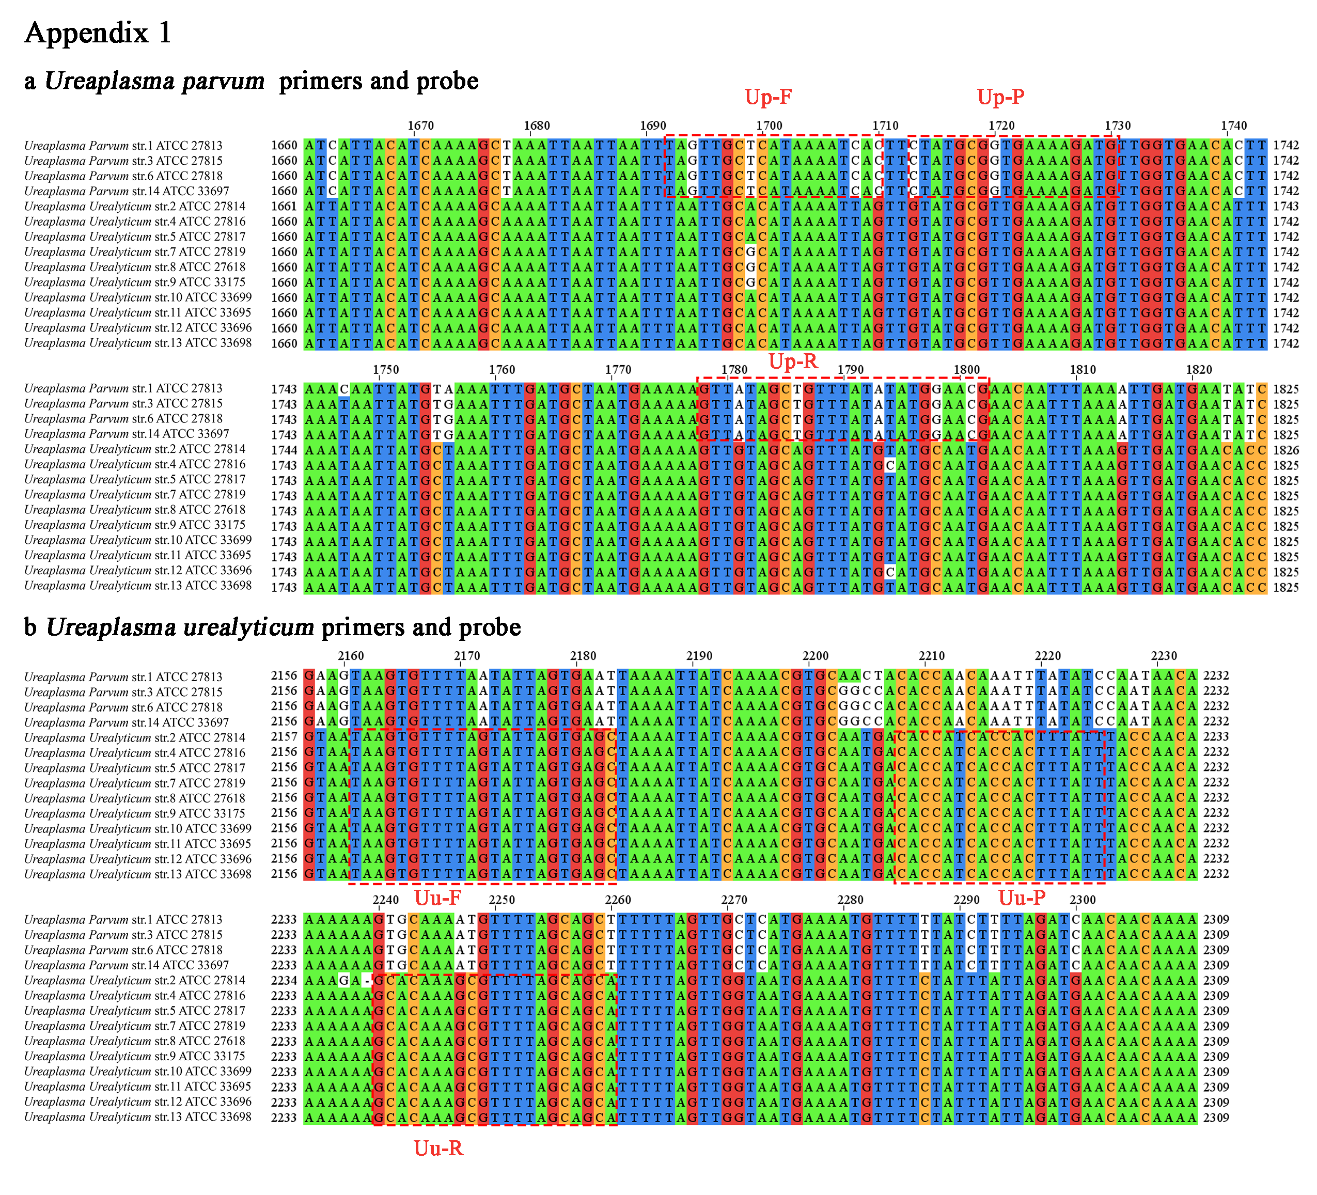

Supplement: Supplementary file 4 [file d0cab1b6e671a617f41927f5.docx]
